1 **Title:** A systematic review of the effectiveness and implementation readiness of  
2 psychosocial interventions for psychosis in South Asia

3 **Running title:** Psychosocial Interventions for Psychosis in South Asia

4 **Authors:**

5 Sophie Lyles<sup>2</sup>, Zahra Khan<sup>1</sup>, Onaiza Qureshi<sup>1</sup>, Madiha Shaikh<sup>2</sup>

6

7 **Affiliations:**

8 <sup>1</sup>Interactive Research and Development, Karachi, Pakistan

9 <sup>2</sup>University College London, London, United Kingdom

10

11 **Corresponding author:** Madiha Shaikh, [Madiha.shaikh@ucl.ac.uk](mailto:Madiha.shaikh@ucl.ac.uk); Research  
12 Department of Clinical, Educational and Health Psychology, University College  
13 London, 1-19 Torrington Place, London WC1E 7HB

14 **Key words:** psychosis, LMICs, psychosocial interventions, schizophrenia, south asia  
15 implementation readiness

16

17

18 **Abstract**

19 **Background:**

20 Little is known about the effectiveness and implementation of psychosocial  
21 interventions for psychosis in low- and middle-income countries (LMICs). In South  
22 Asia, specialist psychiatric resources are scarce. Support for psychosis often falls on  
23 the family or caregiver which can increase feelings of burden, impact caregivers'  
24 wellbeing, and increase mental health stigma. Psychosocial interventions are  
25 increasingly used for psychosis in South Asia and could reduce relapse and  
26 symptoms, reduce caregiver burden, conserve cost and resources. The aim of this  
27 review was to appraise the effectiveness and implementation readiness of  
28 psychosocial interventions for people with psychosis in LMICs within South Asia.

29 **Method:**

30 A systematic search was conducted on MEDLINE, PsycINFO, Global Health, and  
31 Web of Science. The review was prospectively registered on PROSPERO  
32 (CRD42022329254). Studies were rated on two scales assessing quality and  
33 implementation readiness.

34 **Results:**

35 Twenty-six papers were included, nine intervention-types including community-based  
36 interventions/assertive outreach; CaCBTp; FAP; psychoeducation; cognitive  
37 retraining/rehabilitation; social cognition/skills; family/ caregiver intervention;  
38 telehealth intervention; yoga-based intervention in six South Asian countries.  
39 Findings suggest a multicomponent community-based intervention (MCBI) was the  
40 most implementation ready due to its standardisation, good clinical outcome  
41 outcomes for patients and caregivers, and training and cost evaluations.

42 **Conclusion:**

43 Of the included studies, MCBI and community-based outreach interventions utilising  
44 lay health workers appear to be the most implementation ready and are suggested to  
45 best address the treatment gap in South Asia.

46

47

## 48        **1. Introduction**

49        Around 21 million people live with schizophrenia, with the majority residing in low  
50        and middle-income countries (LMICs) (1). The rates of mental health disorders in  
51        South Asia are typically under-reported due to data scarcity, and a significantly more  
52        limited focus on the treatment of mental health disorders (2). Mental health disorders  
53        typically place a significant psychological, social and economic burden on South  
54        Asian citizens, however, up to 90% of people with mental illnesses who need  
55        treatment, do not receive it (3). Inadequate infrastructure, lack of resources, trained  
56        specialist staff or cultural adaptations, focus on biomedical approaches, potential of  
57        transferability for effective and scalable interventions given similar cultural  
58        determinants and healthcare structures shed light on the significant treatment gap in  
59        LMIC and within South Asia (4, 5). Treatment outcomes, particular global functioning  
60        and negative symptoms can be enhanced by psychosocial interventions aimed at  
61        social, health and economic needs of the individual (6). Disease Control Priorities  
62        (DCP-3) suggest self-help, support groups, community-based rehabilitation and  
63        family therapy or support that could address discrepancies in the implementation of  
64        such interventions in LMICs (7). A task shifting model can address the lack of  
65        specialist mental health workers by utilising non-specialist workers such as lay health  
66        workers, peer support workers and nursing staff without psychiatric training. Given  
67        psychosocial interventions have a significant effect on hospitalizations, functioning  
68        and relapse rates (8), and aim to address broader social and life-skills (9), they are  
69        an integral part of recovery to enable individuals and caregivers to reach their goals.  
70        Research suggests there is notably more evidence for the feasibility and  
71        acceptability of psychosocial interventions for psychosis in South Asia than for the  
72        effectiveness of such interventions (10).

73        The aim of this review is to assess effectiveness and implementation readiness (IR)  
74        of psychosocial interventions for people with psychosis on patient outcomes in South  
75        Asia.

76

## 77        **2. Method**

### 78        **2.1 Design**

79 A systematic search of published research on psychosocial interventions for people  
80 with psychosis in South Asia was conducted. The review was prospectively  
81 registered on PROSPERO (CRD42022329254). The PRISMA systematic procedure  
82 was followed to conduct the search, screening, and synthesis of findings (11) (Figure  
83 1).

## 84 **2.2 Search strategy**

85 Reviewers searched MEDLINE, PsycINFO, Global Health, Web of Science, review  
86 articles and reference lists of eligible studies. The search was conducted on 15  
87 October 2022 and all years were included. Search terms for psychosis included  
88 'schizoaffective' or 'schizo\*' or 'psychosis' or 'psychoses' or 'psychotic'. Intervention  
89 search terms were: 'Psychosoc\*' or 'Family intervention\*' or 'CBTp' or 'Social skills  
90 training' or 'Psychological therap\*' or 'Social therap\*' or 'Non pharma\*' or 'Caregiver  
91 intervention\*' or 'intervention\*' or 'psycho therap\*' or 'cognitive therap\*' or 'cognitive  
92 behavioural therap\*' or 'counselling\*' or 'psychotherap\*'. Search terms for South Asia  
93 were: 'South Asia\*' or 'India\*' or 'Bangladesh\*' or 'Bhutan\*' or 'Maldiv\*' or 'Nepal\*' or  
94 'Pakistan\*' or 'Sri Lanka\*' or 'Afghan\*' or 'Indoasia\*' or 'Indo asia'.

## 95 **2.3 Eligibility Criteria**

96 Any psychosocial intervention with a focus on psychological and/or social factors as  
97 opposed to biological factors (pharmacological interventions) delivered to people  
98 with psychosis or their caregivers with the aim of improving individual outcomes in  
99 South Asian countries: Afghanistan, Pakistan, India, Bhutan, Maldives, Nepal, Sri  
100 Lanka, Bangladesh was included. Papers were excluded if no full text was available  
101 in English.

102

## 103 **2.4 Screening and Selection**

104 Papers were imported to Mendeley, where duplicates were removed, and titles and  
105 abstracts were screened against the eligibility criteria. Full texts were retrieved and  
106 screened against the eligibility. References lists were sought for any further studies  
107 meeting the inclusion criteria.

108

## 109 **2.5 Data Extraction**

110 Data reporting on country, design, number of participants, duration of follow up (FU)  
111 and intervention characteristics such as content and outcomes were extracted.

## 112 **2.6 Quality Assessment and Implementation readiness check**

113 Implementation readiness was assessed via the ImpPress (12) checklist. This is a  
114 26-item checklist assessing motivation, theory of change, implementation context,  
115 experience, employee and manager support and resources. Downs and Black (13)  
116 checklist was used to assess quality of papers. This consists of 27-items to assess  
117 the quality of randomised and non-randomised research. All studies were rated by at  
118 least 2 independent raters (SL, MS, ZQ, OQ) on both checklists. Discrepancies were  
119 resolved through discussion or by a third rater.

## 120 **2.7 Data analysis and synthesis**

121 Due to heterogeneity (of populations and interventions examined, research methods  
122 employed, and outcomes measured) of included studies a sound meta-analysis  
123 could not be conducted. Therefore, to ensure that the results could be reported in a  
124 systematic manner, a narrative synthesis was conducted. The narrative synthesis  
125 included: the intervention modality, outcomes targeted and the nature and duration  
126 of the intervention's delivery along with the results of each intervention's  
127 effectiveness. A summary is presented in Table 1.

128

## 129 **3. Results**

130 A total of 1161 records were screened following the removal of duplicates. Title and  
131 abstract screening excluded a further 1045, leaving 116 left for retrieval. No full text  
132 was available for 15 papers and 75 studies were excluded for reasons outlined in  
133 figure 1. This left 26 studies to be included in this review encompassing 9  
134 interventions across 6 countries.

135

### 136 **3.1 Quality Assessment**

137 Downs and Blacks (13) ratings averaged at 16/26. The highest quality study was an  
138 evaluation study of a psychoeducation intervention by Kulhara et al (2009) (14) with  
139 23/26 and the lowest quality study was Rajeswaran, Taksal and Jain (15) with 6/26.

140 Agreement between raters was substantial ( $k = .690$ ). ImpRes (IR) ratings averaged  
141 at 26/52. A multicentre, parallel-group, randomised controlled trial in India scored  
142 highest (42/52) (16) and the least was a cognitive rehabilitation programme in India  
143 (17), scoring 7/52. Studies scored highest in motivation for evaluating the  
144 intervention, the theoretical underpinnings of how and why change could occur and  
145 population characteristics. Few studies reported on managerial and employee  
146 support, training costs, time needed for planning and setting up the intervention or  
147 barriers to implementation. Agreement between raters was substantial ( $k = .781$ ).  
148  
149

150 Figure 1. PRISMA flow diagram

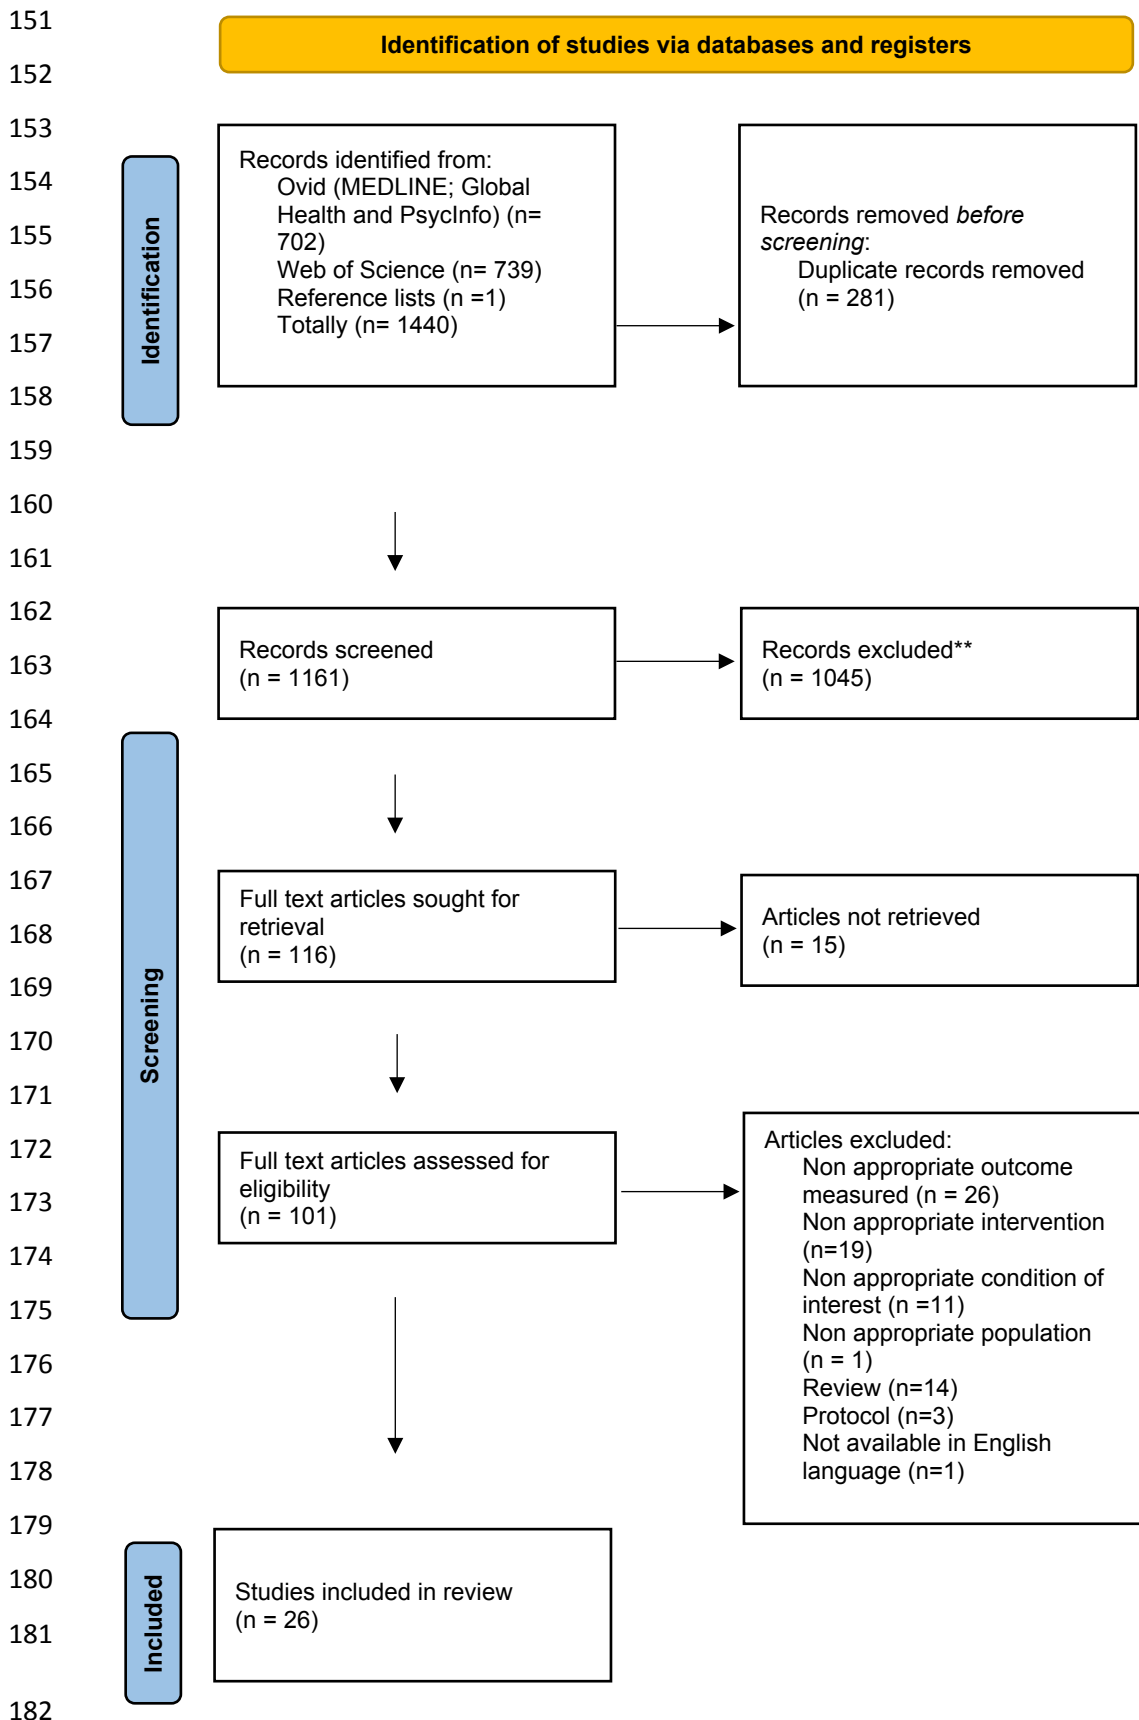

183 Table 1. Summary of included studies

184

| Significant quantitative improvement (☑/☒/-)           |              |                             |           |                 |                     |                                               |                                      |                |                     |                       |           |                  |                  |                    |
|--------------------------------------------------------|--------------|-----------------------------|-----------|-----------------|---------------------|-----------------------------------------------|--------------------------------------|----------------|---------------------|-----------------------|-----------|------------------|------------------|--------------------|
| Intervention                                           | Duration     | Design                      | Country   | Author          | Participants<br>(n) | Average<br>Downs &<br>Black<br>score<br>(/26) | Average<br>ImpRes<br>rating<br>(/52) | PANSS<br>score | Disability<br>score | Social<br>functioning | Cognition | Coping<br>skills | Burden<br>scores | Quality<br>of life |
| Multifaceted<br>intervention/<br>assertive<br>outreach | 12<br>months | RCT                         | India     | Chatterjee (16) | 282                 | 21                                            | 42                                   | ☑              | ☑                   | -                     | -         | -                | -                | -                  |
|                                                        | 18<br>months | Prospective<br>cohort study | India     | (18)            | 100                 | 16                                            | 28                                   | ☑              | ☑                   | -                     | -         | -                | ☑                | -                  |
|                                                        | 24<br>months |                             | Nepal     | (19)            | 95                  | 17                                            | 36                                   | ☑              | ☑                   | -                     | -         | -                | -                | -                  |
|                                                        | 12<br>months | Mixed<br>methods            | Sri Lanka | (20)            | 50                  | 17                                            | 22                                   | -              | -                   | -                     | -         | -                | -                | -                  |
|                                                        | 3<br>months  | Case Study                  | India     | (17)            | 1                   | 10                                            | 7                                    | (MMSE)         | -                   | -                     | -         | -                | -                | -                  |
| Culturally<br>adapted                                  | 12<br>weeks  | RCT                         | Pakistan  | (21)            | 36                  | 21                                            | 31                                   | ☑              | -                   | -                     | -         | -                | -                | -                  |



|                                         |            |                 |          |      |     |    |    |                                     |                                     |                                     |                                     |                                     |                                     |                                     |
|-----------------------------------------|------------|-----------------|----------|------|-----|----|----|-------------------------------------|-------------------------------------|-------------------------------------|-------------------------------------|-------------------------------------|-------------------------------------|-------------------------------------|
| Cognitive Behaviour Therapy (CaCBTp)    | 16 weeks   | RCT             | Pakistan | (22) | 42  | 19 | 28 | <input checked="" type="checkbox"/> | -                                   | -                                   | -                                   | -                                   | -                                   | -                                   |
|                                         | 4 months   | RCT             | Pakistan | (23) | 116 | 20 | 34 | <input checked="" type="checkbox"/> | -                                   | -                                   | -                                   | -                                   | -                                   | -                                   |
| Functional Analytic Psychotherapy (FAP) | 15 weeks   | Pre-post design | India    | (24) | 10  | 10 | 14 | <input checked="" type="checkbox"/> | -                                   | -                                   | -                                   | <input checked="" type="checkbox"/> | -                                   | <input checked="" type="checkbox"/> |
| Psychoeducation                         | 1 session  | RCT             | India    | (25) |     | 16 | 10 | <input checked="" type="checkbox"/> | <input checked="" type="checkbox"/> | -                                   | -                                   | -                                   | -                                   | <input checked="" type="checkbox"/> |
|                                         | 11 days    | Pre-post design | India    | (26) | 60  | 9  | 13 | -                                   | -                                   | -                                   | -                                   | -                                   | -                                   | -                                   |
| Cognitive Rehabilitation/retraining     | 8 weeks    | RCT             | India    | (27) | 45  | 20 | 26 | <input checked="" type="checkbox"/> | <input checked="" type="checkbox"/> | -                                   | <input checked="" type="checkbox"/> | -                                   | <input checked="" type="checkbox"/> | -                                   |
|                                         | 10 weeks   | Case study      | India    | (15) | 1   | 6  | 17 | -                                   | -                                   | -                                   | <input checked="" type="checkbox"/> | -                                   | -                                   | -                                   |
| Social skills/cognition                 | 2.5 months | Longitudinal    | India    | (28) | 29  | 17 | 29 | -                                   | -                                   | <input checked="" type="checkbox"/> | <input checked="" type="checkbox"/> | -                                   | -                                   | -                                   |

|                        |            |                           |             |                  |     |    |    |                                     |                                     |                                     |                                     |                                     |                                     |                                     |
|------------------------|------------|---------------------------|-------------|------------------|-----|----|----|-------------------------------------|-------------------------------------|-------------------------------------|-------------------------------------|-------------------------------------|-------------------------------------|-------------------------------------|
|                        | 2.5 months | Longitudinal              | India       | (29)             | 29  | 17 | 31 | -                                   | -                                   | <input checked="" type="checkbox"/> | <input checked="" type="checkbox"/> | -                                   | -                                   | -                                   |
|                        | 4-6 weeks  | Descriptive               | India       | (30)             | 10  | 14 | 32 | <input checked="" type="checkbox"/> | -                                   | -                                   | <input checked="" type="checkbox"/> | -                                   | -                                   | -                                   |
| Caregiver intervention | 17 months  | Longitudinal              | India       | (31)             | 46  | 10 | 17 | -                                   | -                                   | -                                   | -                                   | <input checked="" type="checkbox"/> | -                                   | -                                   |
|                        | 3 months   |                           | India       | (32)             | 66  | 15 | 32 | -                                   | -                                   | -                                   | -                                   | -                                   | <input checked="" type="checkbox"/> | <input checked="" type="checkbox"/> |
|                        | 4 weeks    | Cohort study              | India       | (33)             | 18  | 15 | 28 | <input checked="" type="checkbox"/> | -                                   | -                                   | -                                   | -                                   | <input checked="" type="checkbox"/> | -                                   |
|                        | 3 months   | Quasi-experimental design | India       | (34)             | 59  | 17 | 27 | -                                   | -                                   | -                                   | -                                   | -                                   | -                                   | -                                   |
|                        | 9 weeks    | RCT                       | Pakistan    | (35)             | 108 | 18 | 24 | -                                   | -                                   | -                                   | -                                   | -                                   | <input checked="" type="checkbox"/> | -                                   |
|                        | 9 months   | RCT                       | India       | (14)             | 76  | 23 | 33 | <input checked="" type="checkbox"/> | <input checked="" type="checkbox"/> | -                                   | -                                   | <input checked="" type="checkbox"/> | <input checked="" type="checkbox"/> | -                                   |
|                        | 3 weeks    | Quasi-experimental design | India       | (36)             | 21  | 14 | 15 | -                                   | -                                   | -                                   | -                                   | -                                   | -                                   | -                                   |
|                        | 4 months   | Cohort study              | India       | (37)             | 60  | 19 | 26 | -                                   | -                                   | -                                   | -                                   | <input checked="" type="checkbox"/> | <input checked="" type="checkbox"/> | -                                   |
| Telehealth             | N/A        | Cross-sectional           | Afghanistan | Khoja et al (38) | 550 | 7  | 25 | -                                   | -                                   | -                                   | -                                   | -                                   | -                                   | -                                   |

|                         |         |     |       |                       |    |    |    |   |   |   |   |   |   |   |
|-------------------------|---------|-----|-------|-----------------------|----|----|----|---|---|---|---|---|---|---|
| Yoga-based intervention | 4 weeks | RCT | India | Varambally et al (39) | 29 | 18 | 25 | ☒ | ☒ | - | - | - | ☑ | ☑ |
|-------------------------|---------|-----|-------|-----------------------|----|----|----|---|---|---|---|---|---|---|

☑= significant improvement, ☒= no significant improvement, - = not assessed/reported.

185

186

187 Studies were grouped together based on type of intervention (community-based  
188 interventions/assertive outreach; CaCBTp; FAP; psychoeducation; cognitive  
189 retraining/rehabilitation; social cognition/skills; family/ caregiver intervention;  
190 telehealth intervention; yoga-based intervention).

### 191 **3.2 Comprehensive community-based interventions/ Assertive Outreach**

#### 192 **3.2.1 India.**

193 A randomised-controlled trial (RCT) compared the effectiveness of a community-  
194 based intervention and facility-based intervention (n=187), to facility-based care  
195 alone (n=95) (16). It was awarded the highest IR score (42/52) due to the  
196 consideration of cost-effectiveness, training community health workers and tailoring  
197 the intervention to the individual needs of the person. It comprised of structured  
198 needs assessments; psychoeducation for participants and caregivers; adherence  
199 support; health promotion support; individualised rehabilitation to address personal,  
200 social, and work functioning; support with experiences of stigma and discrimination;  
201 self-help and user-led support; access to wider network to address contextual social  
202 issues such as benefits, inclusion, and employment. Participants with a primary  
203 diagnosis of schizophrenia were recruited from three rural sites. After 12 months,  
204 Positive and negative symptom scale (PANSS) ((40) (p= 0.08) and Indian disability  
205 evaluation and assessment scale (IDEAS) (41) scores (p= 0.01) were lower in the  
206 experimental group (16).

207 Murthy et al., (18) delivered a community outreach intervention comprised of  
208 memory, attention, planning, verbal and non-verbal fluency and visuo-spatial tasks  
209 for 8 weeks. Treatment as usual (TAU) comprised of usual drug treatment and  
210 psychoeducation. Retraining significantly improved cognition across all domains and  
211 WHO disability assessment scale (p<.001). PANSS Negative scores were  
212 significantly reduced (p= 0.019)

213 Sarwar & Bashir (17) conducted a case study of an individual with chronic  
214 schizophrenia residing in a rehabilitation unit. Symptoms were evaluated using mini  
215 mental state examination, however this lacked standardisation and applicability to  
216 other contexts. The intervention consisted of a 3-month management plan aiming to  
217 increase quality of life and socialization. They measured each problem: hygiene,  
218 socialization, and odd patterns of behaviour on a 0-10 Likert-scale (10= problematic;

219 0= not problematic). They found a reduction in ratings for all domains post-  
220 intervention.

### 221 **3.2.2 Nepal**

222 As part of the Programme for Improving Mental Health Care (PRIME), a primary-  
223 care-based mental health service receiving a package of care including adherence  
224 support and psychological treatment by primary care mental health workers was  
225 evaluated. At 12-months, there was a significant reduction in PANSS scores  
226 ( $p<.001$ ) which was sustained at FU after 24-months ( $p<.001$ ). WHODAS scores  
227 significantly improved ( $p<.0.05$ ) which continued to improve at FU ( $p<.001$ ) (19).

### 228 **3.2.3 Sri Lanka**

229 A study by Rodrigo et al (20) evaluated rapport building interviews, follow-up phone  
230 calls, home visits and ongoing needs assessments conducted by a mental health  
231 development officer (MHDO). MHDOs are recruited from non-psychiatric university  
232 courses to mimic the role of a psychiatric social worker. Despite the outcome  
233 indicators not differing at a level of statistical significance, the intervention group had  
234 better clinic attendance, less relapses, and less defaults.

235

## 236 **3.3 Culturally adapted Cognitive Behaviour Therapy for psychosis (CaCBTp)**

237

### 238 **3.3.1 Pakistan**

239 A RCT evaluated a 12-week CaCBTp intervention against TAU (21). They followed  
240 the manual developed by Kingdon and Turkington (42) encompassing collaborative  
241 understanding, exploring antecedents, normalising rationale, treating co-morbid  
242 anxiety and depression and case formulation as well as specific techniques to  
243 address positive symptoms to explore and develop coping strategies. The cultural  
244 adaptations consisted of using culturally appropriate idioms to explain concepts  
245 relating to symptoms and causes. For example, referring to religious teachings,  
246 speaking in native language (Urdu) and involving carers and family. At 3-months, the  
247 CaCBTp group's PANSS Positive ( $p=0.02$ ), PANSS Negative ( $p=0.045$ ) and PANSS  
248 General Psychopathology ( $p=0.008$ ) scores were significantly lower than controls, as

249 well as higher scores on SAI (schedule for assessment of insight) (43) measuring  
250 insight ( $p=0.01$ ). At 6-month FU, only PANSS Positive scores sustained significant  
251 improvement (21).

252 A pilot RCT for CaCBTp (22) recruited 42 participants with a diagnosis of  
253 schizophrenia. The experimental group ( $n=12$ ) received 16 sessions of CaCBTp over  
254 4 to 6 months in line with NICE guidelines (44) and aligned with protocol developed  
255 by Kingdon and Turkington (42). Adaptations were based on evidence from Naeem et al  
256 (45). These included involving family from the beginning of treatment, using a bio-  
257 psycho-spiritual-social model of mental health, and involving input from faith healers.  
258 At the end of therapy, experimental group showed significant improvement on  
259 PANSS Positive ( $p=.000$ ), PANSS Negative, ( $.000$ ), PANSS general  
260 psychopathology ( $p=.000$ ), PSYRATS (psychotic symptom rating scale) (46)  
261 ( $p=.000$ ) and insight ( $p=.000$ ) (22).

262 A RCT for CaCBTp by Naeem et al., (23) recruited 116 participants from 2 hospitals  
263 in Karachi, Pakistan. Participants received CaCBTp plus TAU ( $n=59$ ) or TAU ( $n=57$ ).  
264 The brief CaCBTp encompassed 6 sessions with involvement of main carer and one  
265 session dedicated to family over 4 months. Treatment protocol followed the Kingdon  
266 and Turkington (42) manual. Preliminary work was conducted via qualitative  
267 interviews to establish adaptations. They highlighted barriers in therapy including  
268 lack of awareness of therapy; family involvement; distance; expenses and  
269 uncooperative caregivers, as well as strengths. The adaptations involved family from  
270 the start of therapy, utilised the bio-psycho-spiritual model and sought support from  
271 faith and religious healers. The experimental group showed significant improvement  
272 on PANSS Positive ( $p=.000$ ), PANSS Negative, ( $.000$ ), PANSS general  
273 psychopathology ( $p=.000$ ), PSYRATS hallucinations ( $p=.000$ ), PSYRATS delusions  
274 ( $p=.000$ ) and SAI ( $p=.007$ ).

275

### 276 **3.4 Functional Analytic Psychotherapy (FAP)**

277

#### 278 **3.4.1 India**

279 A study evaluating FAP recruited 10 participants and assigned to either receive FAP  
280 (n=5) or TAU (n=5). FAP used techniques such as cognitive rationale, social skills  
281 training and applying this in adaptive and community-based environments.  
282 Improvements were found in PANSS Positive (p= 0.042), PANSS Negative  
283 (p=0.043), general psychopathology (p=0.04) and QOL (p=0.043) and coping skills  
284 (CRI-A) (p<.01) (24).

285

### 286 **3.5 Psychoeducation**

#### 287 **3.5.1 India**

288 A single session of psychoeducation experimental study (intervention (n=9) versus  
289 control group (n=25)), scored low on implementation readiness (19/52) (25).  
290 Experimental group received one hour of psychoeducation covering modules in  
291 symptoms, diagnosis, course of illness and prognosis. Issues of stigma,  
292 helplessness and social exclusion were covered. Both groups received antipsychotic  
293 medication administered by their treating clinicians who were blind to the study. Data  
294 was collected at one-month and three-month FU points. There was significant  
295 (p<.005) improvement in the experimental group's PANSS Positive, PANSS total,  
296 symptom severity a global assessment of functioning (GAF). No significant change  
297 was found in PANSS Negative, SAI and WHOQOL-BREF (quality of life) scores in  
298 both groups and no significant change of PANSS general psychopathology in the  
299 experimental group. No significant findings were found between groups (25).

300 Baruah et al., (26) recruited 60 participants with a diagnosis of schizophrenia from  
301 the inpatient department of LGB Regional Institute of Mental Health, Tezpur, Assam  
302 and assigned to either an experimental (n=30) or control (n=30) group. The  
303 experimental group received a psychoeducative intervention package. Participants  
304 were observed on performance of self-care and knowledge about the diagnosis.  
305 Measures were not standardised, however good reliability (r=.913; r=.70) and validity  
306 (five raters used) was found. The experimental group showed significantly higher  
307 knowledge scores (p<.05) compared to baseline and controls post-intervention  
308 (p<.05). Observed self-care performance was significantly higher (p<.05) compared  
309 to controls post-intervention. Post-hoc analysis showed there was no significant  
310 relationships between post-test self-care performance and post-test knowledge in

311 the experimental group ( $p > .05$ ), however due to lack of standardisation and design, it  
312 was awarded the lowest IR score (12/52) (26).

313

### 314 **3.6 Cognitive rehabilitation/ retraining**

315

#### 316 **3.6.1 India**

317 A RCT evaluated the effectiveness of a cognitive retraining programme. All patients  
318 and caregivers received psychoeducation and were assessed at baseline, at 2-  
319 months and 6-months (27) . Forty-five participants with first episode psychosis were  
320 randomly assigned to either experimental group receiving home-based cognitive  
321 retraining along with TAU ( $n=22$ ) or TAU only ( $n=23$ ). The retraining encompassed  
322 attention, mental speed, information processing, memory, verbal fluency, planning,  
323 visuospatial reasoning. The experimental group showed significant improvement  
324 across most cognitive domains ( $p < .05$ ), PANSS scores ( $p < .001$ ) and global  
325 functioning (WHODAS;  $p < .001$ ). Significant differences between groups were found  
326 for motor speed ( $p = .019$ ), executive functioning ( $p = .03$ ), verbal learning and memory  
327 ( $p = .03$ ), visual learning and memory ( $p = .02$ ) and PANSS negative symptoms  
328 ( $p = .019$ ) (27).

329 A case study of a 26-year-old female undergoing cognitive retraining following a  
330 diagnosis of paranoid schizophrenia was evaluated with a pre-post design over 10  
331 weeks. The intervention consisted of neurofeedback training, cognitive retraining in  
332 line with protocol developed by (27) and a family intervention to address  
333 interpersonal difficulties, aid the family in supporting the participant and address any  
334 issues around caregiver burden. The participant completed retraining tasks at home  
335 for 1-hour daily. Significant improvement in social functioning was found, including  
336 communication style, motivation, empathy, and emotional reactivity. Significant  
337 improvement were found in most cognitive domains excluding abstraction (15).

338

### 339 **3.7 Social skills training/ social cognition**

340



### 341        **3.7.1 India**

342        Twenty-nine clinically stable participants with schizophrenia (n=27) or schizoaffective  
343        disorder (n=2) according to DSM-IV-TR were recruited from the outpatient  
344        department of National Institute of Mental Health and Neurosciences (NIMHANS)  
345        and their caregivers. A pre-post design was used to evaluate the effectiveness of an  
346        integrated psychological treatment (IPT). IPT involved between 16-20 bi-weekly  
347        sessions over two and a half months. Modules included cognitive differentiation,  
348        social perception, verbal communication, and social skills and were modified to the  
349        client's specific needs. Caregivers received psychoeducation about schizophrenia,  
350        symptoms, causes adherence, expressed emotion and prognosis which were  
351        tailored to the participants' specific needs. Significant differences were found pre and  
352        post for neurocognitive abilities for intelligence quotient ( $p<.001$ ), colour trails  
353        ( $p=0.027$ ), controlled word association test ( $p=.004$ ), all domains of Reys auditory  
354        verbal learning test ( $p<.001$ ) and the immediate and delayed recall elements of the  
355        Rey's complex figure test ( $p<.001$ ). Significant differences were found between pre  
356        and post for social functioning ( $p<.001$ ), PANSS Positive ( $p<.05$ ), PANSS Negative  
357        ( $p<.001$ ), PANSS general ( $p<.01$ ) and PANSS total ( $p<.001$ ) (28)

358        A culturally adapted 16-20 session IPT was evaluated over two and half months to  
359        29 clinically stable individuals with a diagnosis of schizophrenia. The intervention  
360        was culturally adapted and 23 participants who completed the FU assessments were  
361        analysed. Family caregivers received psychoeducation about schizophrenia and was  
362        involved in homework tasks. Significant improvement was found in social cognition  
363        ( $p<.001$ ), social skills ( $p<.001$ ), PANSS Positive ( $p<.017$ ), negative ( $p<.001$ ), general  
364        psychopathology ( $p<.007$ ) and total ( $p<.001$ ). Post-intervention social perception  
365        showed a medium effect size (0.77) and large for social skills (0.88). At FU, large  
366        effect sizes were found for social perception (0.94), social cue recognition (0.96),  
367        social skills (0.92), social and occupational functioning (1.22) (29).

368        Another study evaluated the effectiveness of the Indian version of the training of  
369        affect recognition (TAR) intervention (30), a social cognition training programme with  
370        10 participants with a diagnosis of schizophrenia (International Centre of Disease-10  
371        [ICD-10]) (WHO, 1993) recruited from a rehabilitation centre. The intervention  
372        consisted of three blocks of four sessions. Each block covered identifying and

373 verbalising facial features of six basic emotions (happy, sad, fear, anger, surprise,  
374 and disgust); identifying and interpreting them in social situations, cues, and  
375 attribution bias. All tasks were translated into Kannada, native language of  
376 Karnataka state in India, social contexts were rendered to be culturally appropriate  
377 and administration methods were modified. There was a significant change in  
378 performance on emotion recognition between pre and post intervention ( $p < .001$ )  
379 measure by Tool for Recognition of Emotions in Neuropsychiatric Disorders  
380 (TRENDS) . There was no significant change in PANSS symptoms ( $p > .05$ ) (30).

381

### 382 **3.8 Caregiver/family interventions**

383

#### 384 **3.8.1 India**

385 Shihabuddeen et al., (31) delivered psychoeducation and problem-solving groups  
386 monthly for 17 months. Twenty-three caregivers of individuals with schizophrenia  
387 were recruited from a psychiatric rehabilitation unit. Post-intervention, 22 of clients  
388 with schizophrenia reported having a good family support system, compared to 4  
389 before the meeting, adequate coping skills compared to 1 prior to the meeting and  
390 good treatment compliance post, compared to 0 prior to the intervention. All 23  
391 reported positive attitudes of the caregiver towards the client, compared to 10 before  
392 the meeting. Due to lack of standardisation, it scored low on the IR (17/52).

393 Kumar et al., (32) evaluated a 2-session psychoeducation and group therapy  
394 intervention in 66 participants and key relatives of patients over 3-months, followed  
395 by bi-weekly follow-up appointments for 3-months. This consisted of rapport building,  
396 education about schizophrenia, expressed emotion, role of key relatives, medication  
397 support, compliance, coping and problem-solving approaches. They found significant  
398 reduction in burden of care (Burden Assessment Scale; BAS) ( $p = .004$ ), improvement  
399 in QOL of caregivers (WHOQOL-BREF) ( $p = .024$ ) and QOL of patients ( $p = .0028$ ) in  
400 the experimental group. They study scored high on IR (34/52).

401 Devaramane et al., (33) delivered a brief psychoeducation intervention over 3  
402 sessions and covered education about schizophrenia, communication, problem  
403 solving skills and expressed emotion. Twenty patients with schizophrenia (ICD-10

404 diagnosis) and primary caregivers were recruited from an inpatient and outpatient  
405 medical academy in India, 18 completed the study. There was significant  
406 improvement in patients PANSS total and positive symptoms ( $p<.001$ ); PANSS  
407 negative and general psychopathology ( $p<.05$ ); BAS ( $p<.001$ ) and family crisis  
408 oriented personal evaluation scale (F-COPES) ( $p<.05$ ); it scored moderately on IR  
409 (28/52).

410 Sadath et al., (34) delivered a 7-session psychoeducation intervention included  
411 psychosocial management of illness, psychosocial needs of caregivers,  
412 engagement, psychoeducation about psychosis to 59 participants with first episode  
413 psychosis and their caregivers. Expressed emotion Widermann et al., 2002) in the  
414 experimental ( $p<.001$ ) and TAU ( $p<.001$ ) groups significantly reduced over time, but  
415 no significant difference were found between groups over time ( $p=.184$ ). Social  
416 support improved significantly in both groups over time (experimental  $p<.001$ ; TAU  
417  $p<.001$ ) but no significant differences between groups over the period ( $p=.064$ ).  
418 However, carers in the experimental group showed significant improvement in  
419 significant others support ( $p=.023$ ) and friends support ( $p=.009$ ) domains of the  
420 social support measure. It scored moderately on IR (26/52).

421 Kulhara et al., (14) evaluated a psychoeducation intervention in 76 participants with  
422 a DSM-IV diagnosis of schizophrenia and their caregivers who were randomly  
423 assigned to receive either the intervention ( $n=38$ ) or TAU ( $n=38$ ) for 9-months. The  
424 intervention covered causes of schizophrenia, symptoms, treatment, goal setting,  
425 substance abuse, marriage, and communication. Symptoms were monitored  
426 monthly, whilst disability, caregiver-burden, caregiver-coping, caregiver-support, and  
427 caregiver-satisfaction were assessed pre and post intervention. The intervention  
428 group showed significantly more improvement in PANSS scores ( $p<.001$ ), disability  
429 scores ( $p<.001$ ), caregiver support ( $p<.001$ ) and satisfaction compared to TAU. No  
430 significant differences were found for caregiver burden or coping ( $p>.05$ ).

431 Anchan and Janardhana (36) evaluated the effectiveness of psychoeducation on  
432 reducing expressed emotion in husbands of women with post-partum psychosis.  
433 Three sessions of psychoeducation covered misconceptions about the diagnosis,  
434 common symptoms, biopsychosocial model explanations and their role in managing  
435 the condition whilst supporting themselves. They attended on a daily or weekly

436 basis; assessments were conducted immediately after completion and at 1-month  
437 FU. Significant improvements were found in authoritarianism when comparing pre to  
438 post intervention ( $p<.05$ ), and pre-intervention to FU ( $p<.05$ ); pre- and post-  
439 intervention social restrictiveness ( $p<.05$ ) and pre to FU ( $p<.05$ ); pre- and post-  
440 intervention community mental health ideology ( $p<.05$ ) and pre to FU ( $p<.05$ ).

441 Chakraborty et al (37) evaluated an 8-session psychoeducation session for  
442 caregivers. This comprised of course, prognosis, outcomes, emotional and  
443 behavioural effects on patients, treatment, side effects, stressors, the role of the  
444 family in rehabilitation and problem solving. Fifty caregivers with one family member  
445 with a diagnosis of schizophrenia (simplex) and 30 with multiple (multiplex). They  
446 found significant reductions in the simplex group across all domains of the BAS  
447 ( $p<.001$ ), effect sizes (-0.6- -3.8), and the problem solving, distraction, acceptance,  
448 and denial domains of coping skills ( $p<.001$ ), effect sizes (-2.6-2.81). In the multiplex  
449 group, the spouse related, physical and mental health, caregiver routine, support of  
450 patients, taking responsibility, patients' behaviour, caregiver strategy were all  
451 significant ( $p<.001$ ) effect sizes (-4.8- -1.6), and problem solving, distraction,  
452 acceptance, and denial domains of coping skills ( $p<.001$ ), effect sizes (-4.8- -2.3).

### 453 **3.8.2 Pakistan**

454 Nasr et al., (35) evaluated a psychoeducation package for 108 patients with a  
455 diagnosis of schizophrenia and their caregivers recruited from an outpatient  
456 department. The intervention followed protocol set out by Kuipers et al., (47) and  
457 encompassed information about schizophrenia, causes, treatment and the family's  
458 role in recovery. Both groups received antipsychotics, one group received  
459 psychoeducation with 99 completing the study. Burden Interview Schedule (48)  
460 scores showed significant reduction in burden in the experimental group compared  
461 to controls in financial ( $p=.056$ ), routine ( $p=.01$ ), leisure ( $p<.001$ ), interaction ( $p<.001$ )  
462 and psychological health ( $p=.035$ ).

463

## 464 **3.9 Telehealth intervention**

465

### 466 **3.9.1 Afghanistan**

467 A cross-sectional study was conducted to assess outcomes of group  
468 psychoeducational meeting interventions across 7 districts and 3 control districts.  
469 One hundred and fifty meetings were conducted in intervention districts attended by  
470 >10,000 people. Significantly more people in the intervention group denied myth of  
471 'jins' (evil spirits), jadu (black magic) or "Wrath or God" cause psychosis compared to  
472 controls ( $p<.001$ ). Significantly more intervention participants found the text  
473 messages easy to understand ( $p<.001$ ) and should be continued ( $p<.001$ ) at point of  
474 evaluation compared to baseline (38).

475

### 476 **3.10 Yoga-based intervention**

477

#### 478 **3.10.1 India**

479 Varambally et al (39) recruited 29 caregivers of people with psychosis (ICD-10) and  
480 randomly assigned them to yoga ( $n=15$ ) or waitlist ( $n=14$ ) conditions. Assessments  
481 were taken pre-intervention and 3-month FU, the intervention group received yoga  
482 training thrice week for 4 weeks and instructed to practice for the following 2-months.  
483 BAS scores were significantly reduced ( $p<.05$ ) and WHOQOL-BREF scores  
484 improved significantly ( $p<.05$ ) at FU compared to controls. No significant changes  
485 were found in psychopathology and disability in patients or anxiety and depression  
486 scores in caregivers.

487

## 488 **4. Discussion**

489 To date, to the best of our knowledge, no other systematic review addresses the  
490 effectiveness and implementation readiness of a range of psychosocial interventions  
491 or programmes for supporting people with psychosis in South Asia. Twenty-six  
492 articles evaluating nine different interventions across five countries in South Asia  
493 were identified. They were situated in India, Pakistan, Afghanistan, Nepal and Sri  
494 Lanka. Populations consisted of those with a diagnosis of schizophrenia or any  
495 variant of psychosis with psychotic features diagnosed using either the ICD-10 or  
496 DSM-IV-TR criteria, or PANSS. The quality of included studies was variable, as were

497 the interventions and outcomes used. Most notably, the highest score awarded for  
498 implementation readiness was 42/52, with almost all studies failing to consider or  
499 report levels of managerial or employee support for the intervention and few studies  
500 reported training costs, time needed for planning and setting up the intervention or  
501 barriers to implementation. Commitment, involvement and accountability of  
502 managers is an essential component of a conducive implementation climate and  
503 increases the likelihood of successful implementation of an intervention (49).

504 Significant improvement in psychological factors (e.g., symptoms) was found in eight  
505 studies. These were multi-component community-based interventions in India,  
506 CaCBTp interventions in Pakistan, family interventions in India and a cognitive  
507 retraining programme in India.

508 MCBi encompassing psychoeducation, caregiver support and treatment adherence  
509 yielded similar results (16). This study encompassed structured needs assessments,  
510 psychoeducation, adherence management strategies, individualised rehabilitation  
511 strategies to improve the person, social and occupational functioning. It addresses  
512 stigma and discrimination issues, social inclusion, access to benefit and employment  
513 schemes and involves caregivers throughout. Moreover, community health workers  
514 were able to deliver the intervention. This provides promising evidence that  
515 interventions addressing multiple components including social and life-skills yield the  
516 most effective results in the treatment of psychosis across countries in South Asia.  
517 Although they initially increase in costs, research suggests that interventions that  
518 address symptoms, involve the wider social network and promote social and  
519 occupational functioning are effective at preventing relapse, thus longitudinally can  
520 reduce costs in financial burden of the family and healthcare system. Furthermore,  
521 the outcomes are consistent with evidence from Gopal et al. (50) who found social  
522 and life-skills to be integral parts of recovery for those with psychosis in LMICs and  
523 should be integrated in treatment packages.

524

525 Other studies providing community-based interventions/ assertive outreach found  
526 significant reductions in disability and symptoms, caregiver burden obtained higher  
527 ImpRes checklist ratings and were studied in different countries including India,  
528 Nepal and Sri Lanka (18, 19, 20). These studies also utilised mental health

529 development officers and primary care mental health workers further strengthening  
530 the argument for a task shifting model and utilising the existing workforce.  
531 Supervised community health workers have been advocated for as a way to scale up  
532 services when specialist resources are scarce in LMICs (51). They can provide  
533 accessible, community-based services to people with psychosis. Although Chatterjee  
534 et al., (16) reported having to complete 6-weeks training, this was due to the RCT  
535 guidelines, and suggest this could be cut down to 3-weeks in a real-world setting.  
536 The findings suggest the model is most effective for those with moderate to severe  
537 schizophrenia, by task-shifting to lay workers, specialist resources are then more  
538 accessible for those who could be more difficult to treat, in line with standard practice  
539 in high-income countries and WHO and the Expert Policy Group of the Ministry of  
540 health in India.

541 CaCBTp scored well on the ImpRess checklist. The cultural adaptations increase the  
542 likelihood that the intervention is implemented into standard practice. However, the  
543 evidence was limited to Pakistan, so was not deemed ready to be implemented  
544 widely in other South Asian countries. One of the key adaptations was reference to  
545 religious teachings and religion varies widely within South Asia and might influence  
546 findings as well as cultural adaptations.

547

#### 548 **4.1 Limitations**

549 Firstly, the broad inclusion criteria which led to the inclusion of heterogeneous  
550 interventions and outcomes meant that a meta-analysis could not be conducted. The  
551 Downs and Black items required a fair amount of interpretation from raters. Few  
552 studies included in this adopted a randomised-controlled design, however this is not  
553 always the most appropriate design for psychotherapy and due to the small sample  
554 sizes of some of the studies, randomization would not be appropriate (52).

555 The ImpRess checklist was originally developed for cognitive stimulation therapy in  
556 the UK which questions its validity in assessing interventions for psychosis.  
557 However, other studies have found it to be a useful means of measuring the IR of  
558 psychosocial interventions in LMICs (53) and is considered a feasible means of  
559 comparing the implementation readiness of psychosocial interventions in general  
560 and in different healthcare systems.

561 Most measures used in included studies were standard for psychosis research.  
562 Commonly, studies used PANSS, QOL, WHODAS and BAS. Few studies used  
563 culturally adapted measures such as IDEAS. However, three studies used non-  
564 standardised measures to assess some or all the outcomes with only one reporting  
565 good reliability and validity.

566

## 567 **4.2 Future recommendations**

568 The findings suggest the implementation of MCBI demonstrates utilisation of limited  
569 resources, to upskill lay health workers, can be considered cost-effective long-term  
570 and aims to address the needs of the population. The broad inclusion criteria and the  
571 fact that participants with a need for additional community care were recruited from  
572 real-world clinical settings across three diverse sites and practice arrangements in  
573 India all suggest that the findings of the trial are generalisable to similar settings in  
574 other low-income and middle-income countries. A review of MCBI, compared across  
575 clinical setting-community vs facility based would establish what specific areas and  
576 using culturally adapted outcome measures to ensure research is measuring what is  
577 appropriate and important in that culture. CaCBTp scored high on implementation  
578 readiness due to cultural adaptations within Pakistan. Future research should aim to  
579 examine its applicability in other South Asian regions.

580 Very few studies included in this review reported on the implementation aspects of  
581 introducing interventions across countries and cultural contexts. Future research on  
582 the effectiveness of psychosocial interventions in South Asia and the LMIC context  
583 would benefit from the routine inclusion of implementation readiness data. This will  
584 inform clinical practice and policy, aiding the scaling up of interventions to  
585 widespread implementation.

## 586 **4.3 Conclusion**

587 MCBI was found to be an adequate intervention for people with psychosis in some  
588 countries in South Asia as demonstrated by its efficacy and implementation  
589 readiness. The findings suggest improvements in symptomatology, disability  
590 functioning and given its utilisation of limited resources and upskilling of lay health  
591 workers could address the treatment gap in South Asia in a cost-efficient manner.



592 CaCBTp and a community-outreach intervention were also deemed effective but not  
593 ready to be implemented in multiple settings.

594

595

596

597

598

599

600

601

602

603

604

605

606

607

## 608 References

- 609 1. Charlson FJ FA, Santomauro DF, Diminic S, Stockings E, Scott JG, McGrath JJ, Whiteford HA. .  
610 Global epidemiology and burden of schizophrenia: findings from the Global Burden of Disease Study  
611 2016. *Schizophr Bull.* 2018;44(6):1195–203.
- 612 2. In: Organization WH, editor. mhGAP Intervention Guide for Mental, Neurological and  
613 Substance Use Disorders in Non-Specialized Health Settings: Mental Health Gap Action Programme  
614 (mhGAP): Version 20. WHO Guidelines Approved by the Guidelines Review Committee. Geneva2016.
- 615 3. Organisation WH. Management of Physical Health Conditions in Adults with Severe Mental  
616 Disorders. WHO Guidelines Approved by the Guidelines Review Committee. Geneva2018.
- 617 4. Patel V. Universal Health Coverage for Schizophrenia: A Global Mental Health Priority.  
618 *Schizophr Bull.* 2016;42(4):885-90.
- 619 5. Nawaz R, Gul S, Amin R, Huma T, Al Mughairbi F. Overview of schizophrenia research and  
620 treatment in Pakistan. *Heliyon.* 2020;6(11):e05545.
- 621 6. Patel V CN, Rahman A, Verdelli H. . Improving access to psychological treatments: lessons  
622 from developing countries. *Behav Res Ther.* 2011;49(9):523-8.
- 623 7. Patel V CD, Parikh R, Charlson FJ, Degenhardt L, Dua T, Ferrari AJ, Hyman S, Laxminarayan R,  
624 Levin C, et al. . Addressing the burden of mental, neurological, and substance use disorders: key  
625 messages from disease control priorities, 3rd edition. *Lancet.* 2015;387(10028):1672–85.
- 626 8. Asher L, Patel, V., & De Silva, M. J. Community-based psychosocial interventions for people  
627 with schizophrenia in low and middle-income countries: systematic review and meta-analysis. *BMC*  
628 *psychiatry.* 2017;17(1):1-15.
- 629 9. Organization. WH. mhGAP: Mental Health Gap Action Programme: scaling up care for  
630 mental, neurological and substance use disorders. Geneva: World Health Organization. 2008.
- 631 10. Brooke-Sumner C PI, Asher L, Mall S, Egbe CO, Lund C. . Systematic review of feasibility and  
632 acceptability of psychosocial interventions for schizophrenia in low- and middle-income countries.  
633 *BMC Psychiatry.* 2015;15(19).
- 634 11. Moher D, Liberati, A., Tetzlaff, J., & Altman, D. G, & the PRISMA Group. Preferred reporting  
635 items for systematic reviews and metaanalyses: The PRISMA statement. *Annals of Internal Medicine.*  
636 2009;151(4):264–9.
- 637 12. Streater A, Spector, A., Aguirre, E., Stansfeld, J., & Orrell, M. J. B. M. R. M. . ImpRes: An  
638 Implementation Readiness checklist developed using a systematic review of randomised controlled  
639 trials assessing cognitive stimulation for dementia. *BMC Medical Research Methodology.*,  
640 2016;16(1):167.
- 641 13. Downs SH, Black N. The feasibility of creating a checklist for the assessment of the  
642 methodological quality both of randomised and non-randomised studies of health care  
643 interventions. *J Epidemiol Community Health.* 1998;52(6):377-84.
- 644 14. Kulhara P, Chakrabarti, S., Avasthi, A., Sharma, A., & Sharma, S. Psychoeducational  
645 intervention for caregivers of Indian patients with schizophrenia: a randomised-controlled trial. *Acta*  
646 *Psychiatrica Scandinavica.*, 2009;119(6):472-83.
- 647 15. Rajeswaran J, Taksal, A., & Jain, S. . Rehabilitation in schizophrenia: a brain-behavior and  
648 psychosocial perspective. *Indian journal of psychological medicine.*, 2017;39(6):797-9.
- 649 16. Chatterjee S. Effectiveness of a community-based intervention for people with schizophrenia  
650 and their caregivers in India (COPSI): a randomised controlled trial. *The Lancet.*  
651 2014;363((9926)):1385-94.
- 652 17. Sarwar A, & Bashir, U. . Effectiveness of Rehabilitation Program for Chronic Schizophrenia: A  
653 Case Study. *Journal of Liaquat University of Medical & Health Sciences.*, 2019;18(2):181-4.
- 654 18. Murthy RS, Kumar, K. K., Chisholm, D., Thomas, T., Sekar, K., & Chandrashekar, C. R. .  
655 Community outreach for untreated schizophrenia in rural India: a follow-up study of symptoms,  
656 disability, family burden and costs. *Psychological medicine.*, 2005;35(3):341-51.

- 657 19. Jordans MJ. Community-, facility-, and individual-level outcomes of a district mental  
658 healthcare plan in a low-resource setting in Nepal: A population-based evaluation. *PLoS medicine*,  
659 2019;16((2)).
- 660 20. Rodrigo C, Welgama, S., Wijeratne, T., Weligepola, R., Rajapakse, S., & Jayananda, G. . A  
661 prospective cohort study on the role of nonspecialist staff in preventing relapses and improving clinic  
662 attendance of patients with schizophrenia. *Indian journal of psychiatry*,. 2013;55(1):74.
- 663 21. Husain MO. Pilot randomised controlled trial of culturally adapted cognitive behavior  
664 therapy for psychosis (CaCBTp) in Pakistan. *BMC health services research*,. 2017;17((1)):1-8.
- 665 22. Habib N, Dawood S, Kingdon D, Naeem F. Preliminary evaluation of culturally adapted CBT  
666 for psychosis (CA-CBTp): findings from developing culturally-sensitive CBT project (DCCP). *Behav*  
667 *Cogn Psychother*. 2015;43(2):200-8.
- 668 23. Naeem F, Saeed S, Irfan M, Kiran T, Mehmood N, Gul M, et al. Brief culturally adapted CBT  
669 for psychosis (CaCBTp): A randomized controlled trial from a low income country. *Schizophr Res*.  
670 2015;164(1-3):143-8.
- 671 24. Sengupta U, & Singh, A. R. . Application of functional analytic psychotherapy to manage  
672 schizophrenia. *Industrial Psychiatry Journal*,. 2021;30(1):55.
- 673 25. Patra S, Kar, N., Mishra, A., & Singh, S. P. . Single-session psychoeducation in schizophrenia: a  
674 feasibility and effectiveness study in an Indian patient population. *Clinical schizophrenia & related*  
675 *psychoses*,. 2011;5(2):107-8.
- 676 26. Baruah A. Effect of psycho-educative intervention on knowledge about illness and self-care  
677 in patients with schizophrenia. *Nursing Journal of India*. 2012;4(103):188.
- 678 27. Hegde S. Addition of home-based cognitive retraining to treatment as usual in first episode  
679 schizophrenia patients: A randomized controlled study. *Indian journal of psychiatry*,. 2012;54((1)):15.
- 680 28. Taksal A, Sudhir, P. M., Janakiprasad, K. K., Viswanath, D., & Thirthalli, J. Feasibility and  
681 effectiveness of the Integrated Psychological Therapy (IPT) in patients with schizophrenia: a  
682 preliminary investigation from India. *Asian journal of psychiatry*,. 2015;17:78-84.
- 683 29. Taksal A, Sudhir, P. M., Janakiprasad, K. K., Viswanath, D., & Thirthalli, J. Impact of the  
684 integrated psychological treatment (IPT) on social cognition, social skills and functioning in persons  
685 diagnosed with schizophrenia: A feasibility study from India. *Psychosis*,. 2016;8(3):214-25.
- 686 30. Thonse U, Behere, R. V., Frommann, N., & Sharma, P. S. V. N. . Social cognition intervention  
687 in schizophrenia: Description of the training of affect recognition program–Indian version. *Asian*  
688 *journal of psychiatry*,. 2018;31:36-40.
- 689 31. Shihabuddeen TI, & Gopinath, P. S. . Group meetings of caretakers of patients with  
690 schizophrenia and bipolar mood disorders. *Indian journal of psychiatry*,. 2005;47(3):153.
- 691 32. Kumar R, Nischal, A., Dalal, P. K., Varma, S., Agarwal, M., Tripathi, A., ... & Gupta, B. . Impact  
692 of brief psychosocial intervention on key relatives of patients with schizophrenia: A randomized  
693 controlled trial. *Indian journal of psychiatry*,. 2020;62(2):137.
- 694 33. Devaramane V. The effect of a brief family intervention on primary carer's functioning and  
695 their schizophrenic relatives levels of psychopathology in India. *Asian journal of psychiatry*.  
696 2011;4((3)):183-7.
- 697 34. Sadath A, Muralidhar, D., Varambally, S., & Gangadhar, B. N. . Does group intervention have  
698 benefits on expressed emotion and social support in carers of persons with first episode psychosis?.  
699 *Social Work in Mental Health*,. 2017:524-37.
- 700 35. Nasr T, & Kausar, R. . Psychoeducation and the family burden in schizophrenia: a randomized  
701 controlled trial. *Annals of general psychiatry*,. 2009;8:1-6.
- 702 36. Anchan V. Transformation of attitude through brief psychoeducation program for the  
703 husbands of women with postpartum psychiatric disorders. *Asian journal of psychiatry*.  
704 2020;51,(101841).
- 705 37. Chakraborty S. Caregiver's burden, coping and psycho-education in Indian households with  
706 single-and multiple-affected members with schizophrenia. *International Journal of Mental Health*  
707 *Promotion*. 2013;5(15):288-98.

- 708 38. Khoja S. Impact of simple conventional and Telehealth solutions on improving mental health  
709 in Afghanistan. *Journal of Telemedicine and Telecare*,. 2016;22(8):495-8.
- 710 39. Varambally S, Vidyendaran, S., Sajjanar, M., Thirthalli, J., Hamza, A., Nagendra, H. R., &  
711 Gangadhar, B. N. . Yoga-based intervention for caregivers of outpatients with psychosis: a  
712 randomized controlled pilot study. *Asian journal of psychiatry*. 2013;6(2):141-5.
- 713 40. Kay SR, Fiszbein A, Opler LA. The positive and negative syndrome scale (PANSS) for  
714 schizophrenia. *Schizophr Bull*. 1987;13(2):261-76.
- 715 41. Thara R RS, Vallecha A. The schedule for assessment of psychiatric disability – a modification  
716 of the DAS-II. *Indian J Psychiatry*. 1988;30:47-53.
- 717 42. Kingdon D TD. *Cognitive-Behavioural Therapy of Schizophrenia*. Hove: Lawrence Erlbaum;.  
718 1994.
- 719 43. David A, Buchanan, A., Reed, A., Almeida, O. The assessment of insight in psychosis. *Br J*  
720 *Psychiatry*. 1992;161(5):599-602.
- 721 44. National Institute for Health and Care Excellence: Guidelines. Psychosis and schizophrenia in  
722 adults: prevention and management. London: National Institute for Health and Care Excellence  
723 (NICE)
- 724 Copyright © NICE 2019.; 2014.
- 725 45. Naeem F. Family Work for Schizophrenia: A Practical Guide, second edition: Kuipers, E., Leff,  
726 J. & Lam, D. *Psychiatric Bulletin*. 2004;28:185-6.
- 727 46. Haddock G, McCarron J, Tarrier N, Faragher EB. Scales to measure dimensions of  
728 hallucinations and delusions: the psychotic symptom rating scales (PSYRATS). *Psychological*  
729 *medicine*. 1999;29(4):879-89.
- 730 47. Kuipers LaJPaLD. Family Work for Schizophrenia: A Practical Guide1992.
- 731 48. Pai S, & Kapur, R. L. The burden on the family of a psychiatric patient: development of an  
732 interview schedule. *The British Journal of Psychiatry*,. 1981;138(4):332-5.
- 733 49. Damschroder LJ, Aron DC, Keith RE, Kirsh SR, Alexander JA, Lowery JC. Fostering  
734 implementation of health services research findings into practice: a consolidated framework for  
735 advancing implementation science. *Implement Sci*. 2009;4:50.
- 736 50. Gopal S, Mohan, G., John, S., & Raghavan, V. . What constitutes recovery in schizophrenia?  
737 Client and caregiver perspectives from South India. *International Journal of Social Psychiatry*.  
738 2020;66(2):118-23.
- 739 51. Hanlon C FA, Jordans M, Kigozi F, Petersen I, Shidhaye R, Honikman S, Lund C, Prince M, Raja  
740 S, et al. . District mental healthcare plans for five low- and middle-income countries: commonalities,  
741 variations and evidence gaps. *Br J Psychiatry*. 2016;208(56):47-54.
- 742 52. Negida A. “Randomized Controlled-Trial” is good but not gold-standard. *Negida Research*  
743 *Archives*,. 2020;1:4-7.
- 744 53. Stoner CR, Lakshminarayanan M, Durgante H, Spector A. Psychosocial interventions for  
745 dementia in low- and middle-income countries (LMICs): a systematic review of effectiveness and  
746 implementation readiness. *Aging Ment Health*. 2021;25(3):408-19.

747

748
